# Supplementary material for: Detection of Volatile Organic Compounds by Self-assembled Monolayer Coated Sensor Array with Concentration-independent Fingerprints
Source: PubMed Central journal article supplement (PMC4820718; doi:10.1038/srep23970), 2016-04-05
Supplement: srep23970-s1.pdf [file srep23970-s1.pdf]

# Supporting Information

Detection of Volatile Organic Compounds by

Self-assembled Monolayer Coated Sensor

Array with Concentration-independent

Fingerprints

**Ye Chang,<sup>#</sup> Ning Tang,<sup>#</sup> Hemi Qu, Jing Liu, Daihua Zhang, Hao Zhang, Wei Pang, Xuexin Duan<sup>\*</sup>**

State Key Laboratory of Precision Measuring Technology & Instruments, College of Precision  
Instrument and Opto-electronics Engineering, Tianjin University, Tianjin 300072, China

<sup>#</sup> These authors contributed equally to this work.

<sup>\*</sup> Corresponding Authors.

Tel.: +86-22-27401002

E-mail: [xduan@tju.edu.cn](mailto:xduan@tju.edu.cn)

## 1. Amine-NHS reaction

Figure S1 illustrates the reaction process of 5(6)-Carboxytetramethylrhodamine N-succinimidyl ester (TAMRA) with (3-aminopropyl) triethoxysilane (APTES) modified FBAR for amine density characterization

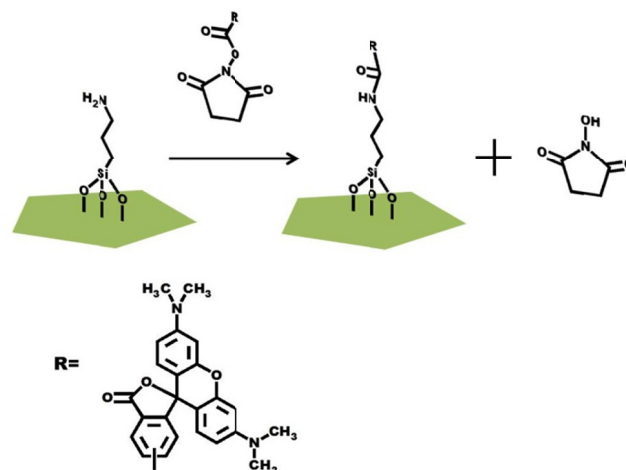

**Figure S1.** Reaction process of amine with TAMRA.

## 2. Contact angles measurement

Figure S2 shows the CA results of nine SAMs.

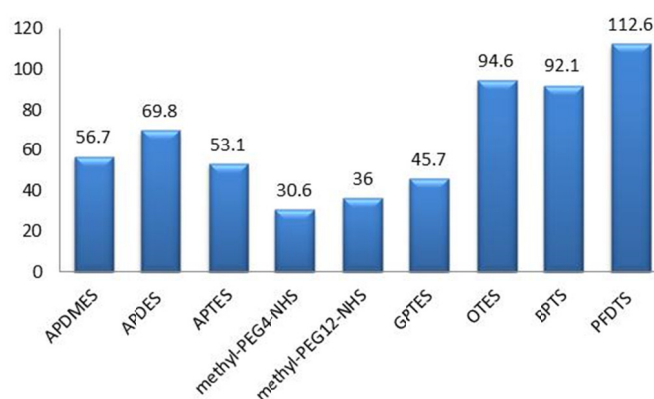

**Figure S2.** CA results of AlN substrates after silane chemistry of nine SAMs.

## 3. Fourier transform infrared spectroscopy measurement

Figure S3 shows the FT-IR spectra of the modified monolayers on the AlN substrates. APTES-modified and OTES-modified monolayer spectrums show reflection peaks at  $1546\text{cm}^{-1}$  and  $2860\sim 2930\text{cm}^{-1}$  due to the vibration of  $\text{NH}_2$  and the stretch of  $\text{CH}_2$ , respectively. Meanwhile, Methyl-PEG-NHS-modified and GPTES-modified monolayer spectrums peak at  $1103\text{cm}^{-1}$  and  $1265\text{cm}^{-1}$ , which is attributed to stretching of the functional group of C-O. The characteristic vibration of the bromine end-group at  $692\text{cm}^{-1}$  confirms the BPTS monolayer. Additionally, the C-F vibration at  $1260\text{cm}^{-1}$  was assigned to the PFDTS functionalization monolayer, indicating the formation of fluoride group of the PFDTS after silanization.

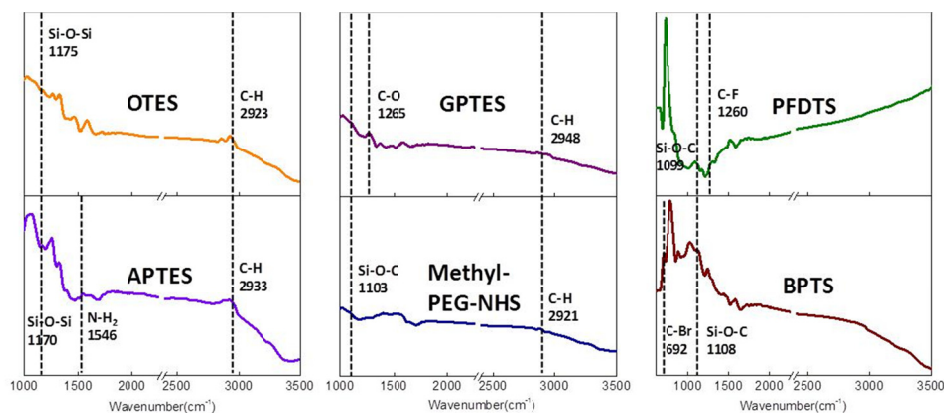

**Figure S3.** Surface IR spectra of the SAMs on AlN substrates.

#### 4. VOCs detection setup

Figure S4 shows the VOCs detection setup used in this work. The setup consists of two parts, the VOCs delivery system and the VOCs testing system. In the VOCs delivery system, vapor of the VOC line was delivered by bubbling 99.999% pure carrier N<sub>2</sub> gas into VOC liquid. Different gas partial pressures were achieved by adjusting the flow velocity of N<sub>2</sub> from the dilution line. The flow velocity was monitored by the mass flow controller. For exhausts treatment, a VOCs absorber filled with ethanol was added at the end of the system. In the VOCs testing system, functionalized FBARs were wire-bonded to evaluation boards, which were packaged in glass chambers and connected to a network analyzer.

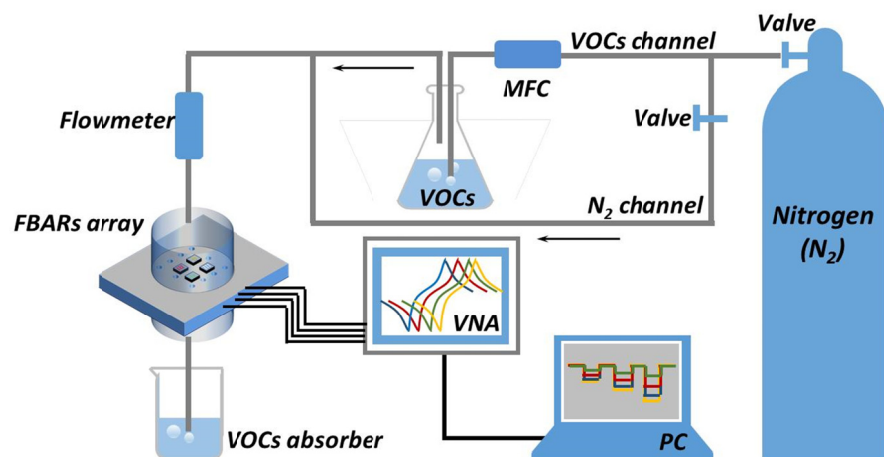

**Figure S4.** The VOCs detection setup.

## 5. Real-time frequency responses of FBAR arrays

Figure S5-7 shows the real-time frequency responses of FBAR arrays in exposure to methanol, ethanol, NPA and acetone vapors respectively at eight different concentrations.

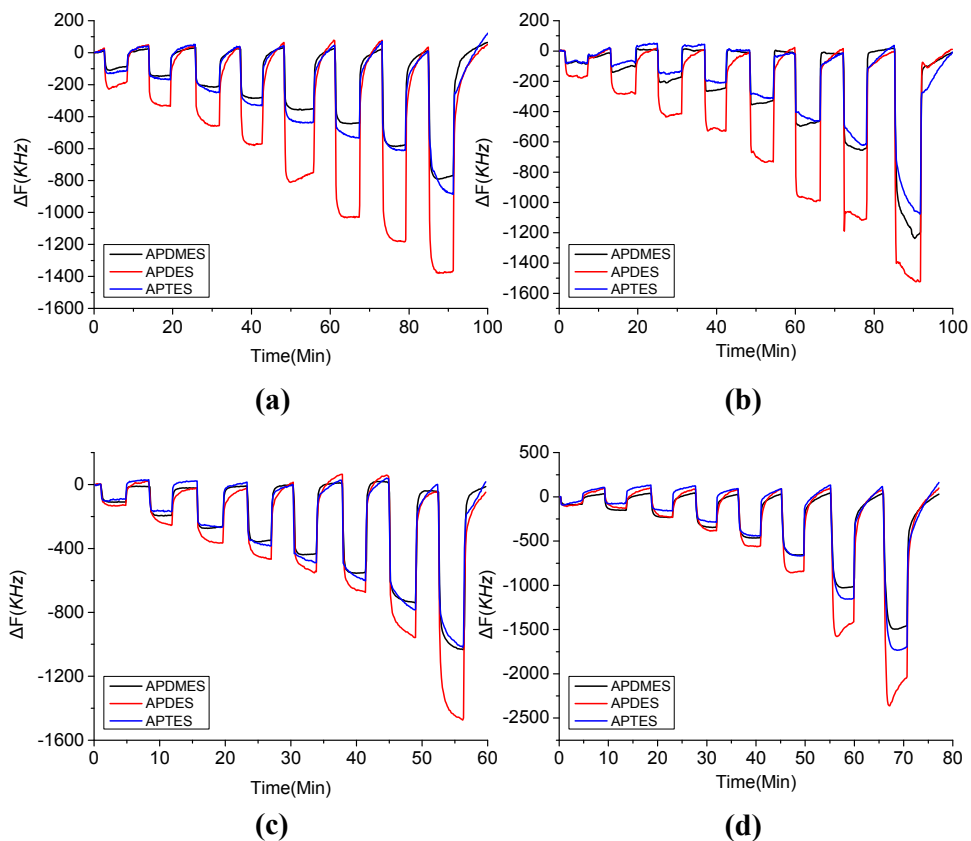

**Figure S5.** Real-time frequency responses of the FBAR arrays functionalized with APDMES, APDES and APTES in exposure to (a) methanol, (b) ethanol, (c) NPA and (d) acetone vapors respectively at eight different concentrations.

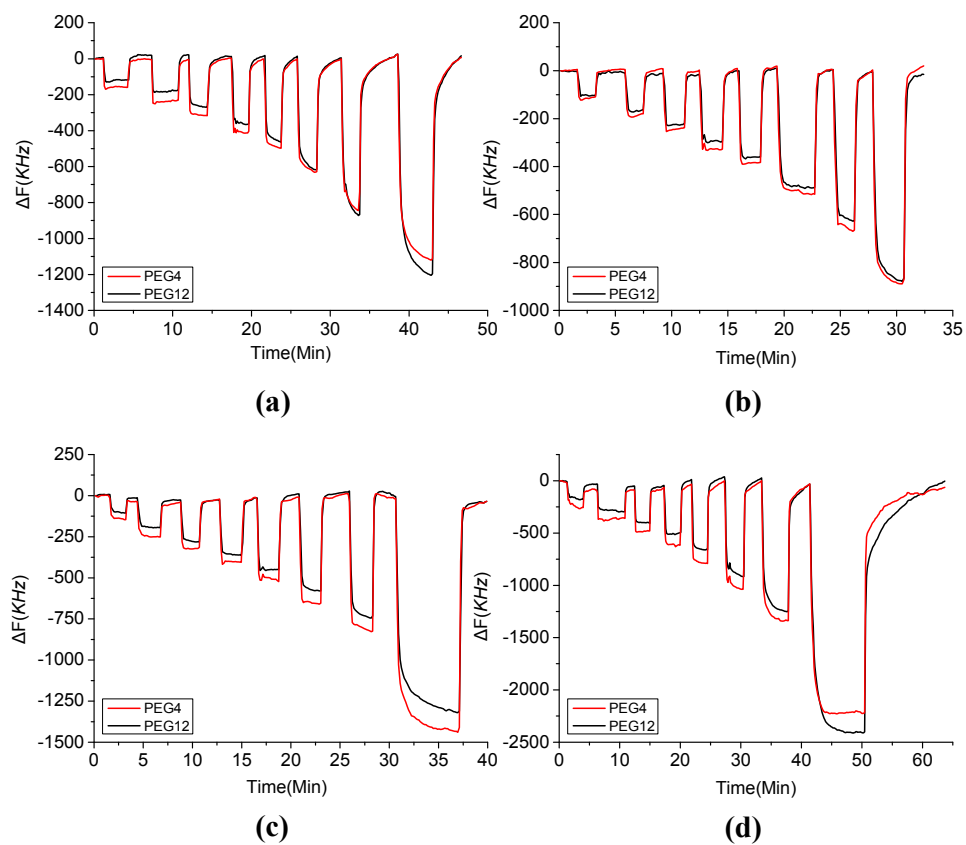

**Figure S6.** Real-time frequency responses of the FBAR arrays functionalized with methyl-PEG4-NHS and methyl-PEG12-NHS in exposure to (a) methanol, (b) ethanol, (c) NPA and (d) acetone vapors respectively at eight different concentrations.

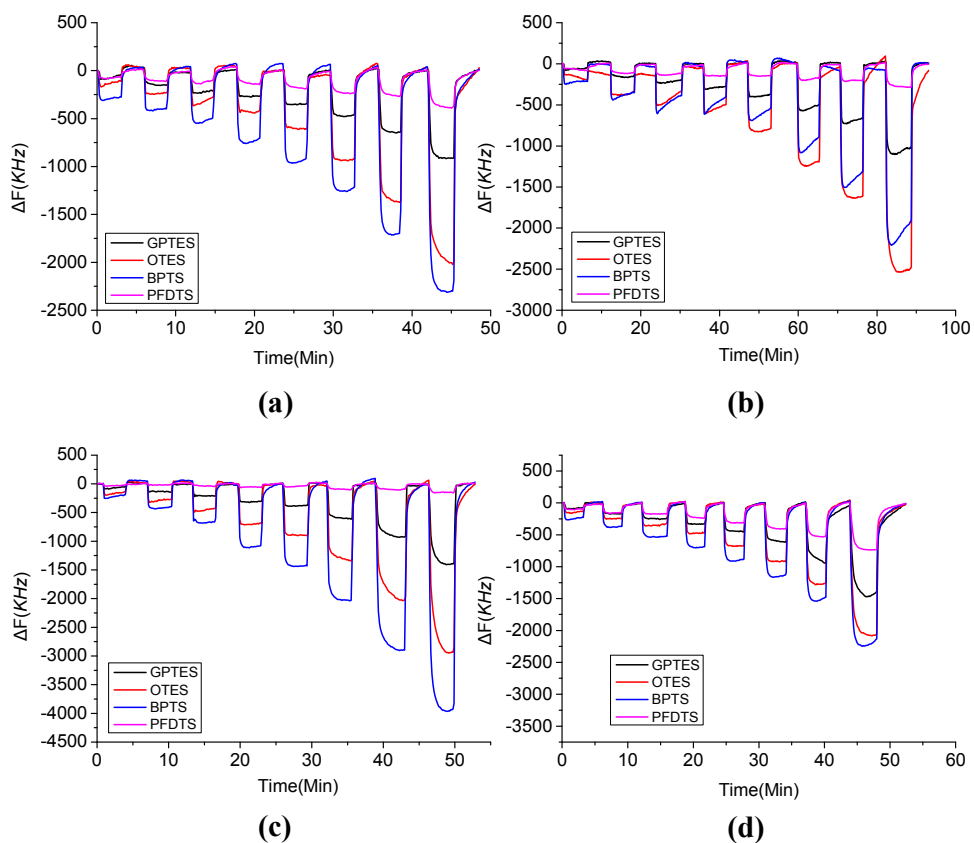

**Figure S7.** Real-time frequency responses of the FBAR arrays functionalized with GPTES, OTES, BPTS and PFDTS in exposure to (a) methanol, (b) ethanol, (c) NPA and (d) acetone vapors respectively at eight different concentrations.



## 6. Fitting results of adsorption isotherms

Adsorption isotherms of five VOCs to nine SAMs were fitted with BET equation.

Table S1 lists the fitting results.

**Table S1.** Fitting results of adsorption isotherms.

| VOC    | Methanol |          |         | Ethanol  |          |         | NPA      |         |         |
|--------|----------|----------|---------|----------|----------|---------|----------|---------|---------|
|        | $v_m$    | C        | $r^2$   | $v_m$    | C        | $r^2$   | $v_m$    | C       | $r^2$   |
| APDMES | 175.8668 | 6.75968  | 0.9946  | 67.24171 | 11.33556 | 0.96086 | 237.249  | 6.45488 | 0.98538 |
| APDES  | 393.7338 | 4.70486  | 0.98089 | 161.8313 | 5.23239  | 0.99918 | 279.3458 | 6.08471 | 0.99179 |
| APTES  | 177.4176 | 14.99026 | 0.99289 | 232.3056 | 2.47531  | 0.9972  | 217.1876 | 9.48507 | 0.96804 |
| PEG4   | 231.8277 | 12.77046 | 0.99482 | 220.3477 | 4.01286  | 0.97772 | 276.6123 | 5.1279  | 0.99933 |
| PEG12  | 237.2227 | 8.05648  | 0.99609 | 225.542  | 6.09021  | 0.98967 | 265.9447 | 3.99252 | 0.99889 |
| GPTES  | 191.5279 | 5.51511  | 0.99323 | 215.9976 | 4.33559  | 0.98609 | 321.4467 | 1.81317 | 0.99905 |
| OTES   | 383.856  | 4.34145  | 0.97656 | 394.2374 | 6.25385  | 0.99359 | 568.6147 | 3.8841  | 0.99388 |
| BPTS   | 502.9128 | 7.82923  | 0.99519 | 439.1493 | 2.66965  | 0.99    | 836.3522 | 4.07558 | 0.98776 |
| PFDTs  | 85.00887 | 10.27118 | 0.9928  | 449.4547 | 3.36969  | 0.98839 | 36.87076 | 5.34105 | 0.95366 |

| VOC    | IPA       |          |         | Acetone   |         |         |
|--------|-----------|----------|---------|-----------|---------|---------|
|        | $v_m$     | C        | $r^2$   | $v_m$     | C       | $r^2$   |
| APDMES | 159.5244  | 4.54017  | 0.98965 | 251.8043  | 3.54231 | 0.99942 |
| APDES  | 200.34674 | 2.70269  | 0.9993  | 404.27549 | 1.91198 | 0.99039 |
| APTES  | 138.72842 | 6.64317  | 0.99598 | 274.28098 | 3.70152 | 0.99044 |
| PEG4   | 263.67588 | 10.29638 | 0.99237 | 388.98473 | 6.21751 | 0.99488 |
| PEG12  | 254.66766 | 8.10887  | 0.98996 | 376.58567 | 4.13778 | 0.99202 |
| GPTES  | 195.47399 | 3.53581  | 0.9923  | 245.70181 | 3.3742  | 0.99452 |
| OTES   | 387.81368 | 5.05927  | 0.99144 | 395.61681 | 3.19108 | 0.99799 |
| BPTS   | 556.32641 | 4.25224  | 0.98105 | 425.35995 | 7.98229 | 0.99554 |
| PFDTs  | 27.15954  | 7.38894  | 0.99577 | 136.90933 | 8.31037 | 0.99385 |

## 7. Fitting results of desorption process

Desorption processes of five VOCs to nine SAMs were fitted with JMA equation.

Table S2 lists the fitting results.

**Table S2.** Fitting results of desorption process.

| VOC    | Methanol |         | Ethanol |         | NPA     |         | IPA     |         | Acetone |         |
|--------|----------|---------|---------|---------|---------|---------|---------|---------|---------|---------|
|        | k        | S       | k       | S       | k       | S       | k       | S       | k       | S       |
| APDMES | 0.1189   | 0.03092 | 0.22119 | 0.08681 | 0.12964 | 0.04215 | 0.30263 | 0.1153  | 0.11806 | 0.02082 |
| APDES  | 0.0834   | 0.03254 | 0.17991 | 0.09442 | 0.10621 | 0.00992 | 0.15183 | 0.03993 | 0.06144 | 0.01469 |
| APTES  | 0.09077  | 0.02599 | 0.28644 | 0.08406 | 0.17291 | 0.02727 | 0.36478 | 0.12635 | 0.18646 | 0.04215 |
| PEG4   | 0.19272  | 0.05493 | 0.2381  | 0.03142 | 0.31233 | 0.13881 | 0.33169 | 0.12909 | 0.30285 | 0.10798 |
| PEG12  | 0.1555   | 0.03792 | 0.16642 | 0.03979 | 0.21166 | 0.07365 | 0.23433 | 0.03308 | 0.20022 | 0.06201 |
| GPTES  | 0.2317   | 0.03362 | 0.24077 | 0.10242 | 0.3506  | 0.17111 | 0.27949 | 0.11055 | 0.17721 | 0.09037 |
| OTES   | 0.2357   | 0.04648 | 0.22387 | 0.07978 | 0.20449 | 0.06314 | 0.24248 | 0.06638 | 0.13728 | 0.045   |
| BPTS   | 0.1581   | 0.05972 | 0.16033 | 0.06393 | 0.14777 | 0.01598 | 0.16749 | 0.03488 | 0.11949 | 0.02716 |
| PFDTs  | 0.08886  | 0.01751 | 0.05797 | 0.01493 | 0.06085 | 0.02491 | 0.13655 | 0.09201 | 0.09492 | 0.03047 |

## 8. Normalization parameters of VOCs.

**Table S3.** Three normalization parameters of VOCs.

| VOC      |                      | APDMES  | APDES   | APTES   | PEG4    | PEG12   | GPDES   | OTES    | BPTS    | PFDTS   |
|----------|----------------------|---------|---------|---------|---------|---------|---------|---------|---------|---------|
|          | <i>k</i>             | 0.50445 | 0.35384 | 0.38511 | 0.81765 | 0.65974 | 0.98303 | 1       | 0.67077 | 0.377   |
| Methanol | <i>v<sub>m</sub></i> | 0.3497  | 0.78291 | 0.35278 | 0.46097 | 0.4717  | 0.38084 | 0.76327 | 1       | 0.16903 |
|          | <i>C</i>             | 0.45094 | 0.31386 | 1       | 0.85192 | 0.53745 | 0.36791 | 0.28962 | 0.52229 | 0.68519 |
|          | <i>k</i>             | 0.7722  | 0.62809 | 1       | 0.83124 | 0.58099 | 0.84056 | 0.78156 | 0.55973 | 0.20238 |
| Ethanol  | <i>v<sub>m</sub></i> | 0.51686 | 0.97707 | 0.52147 | 0.50181 | 0.49026 | 0.59593 | 1       | 0.96985 | 0.14961 |
|          | <i>C</i>             | 0.21837 | 0.23551 | 0.46159 | 0.53727 | 0.35401 | 0.38248 | 0.29727 | 0.5517  | 1       |
|          | <i>k</i>             | 0.36977 | 0.30294 | 0.49318 | 0.89084 | 0.60371 | 1       | 0.58326 | 0.42148 | 0.17356 |
| NPA      | <i>v<sub>m</sub></i> | 0.28367 | 0.334   | 0.25968 | 0.33074 | 0.31798 | 0.37573 | 0.67987 | 1       | 0.04409 |
|          | <i>C</i>             | 0.68053 | 0.6415  | 1       | 0.54063 | 0.42093 | 0.19116 | 0.4095  | 0.42968 | 0.5631  |
|          | <i>k</i>             | 0.82962 | 0.41622 | 1       | 0.90929 | 0.64239 | 0.76619 | 0.66473 | 0.45915 | 0.37434 |
| IPA      | <i>v<sub>m</sub></i> | 0.25442 | 0.31952 | 0.22125 | 0.42052 | 0.40616 | 0.31175 | 0.69793 | 1       | 0.04332 |
|          | <i>C</i>             | 0.44095 | 0.26249 | 0.64519 | 1       | 0.78755 | 0.3434  | 0.49136 | 0.41298 | 0.71763 |
|          | <i>k</i>             | 0.38983 | 0.20287 | 0.61568 | 1       | 0.66112 | 0.58514 | 0.45329 | 0.39455 | 0.31342 |
| Acetone  | <i>v<sub>m</sub></i> | 0.59198 | 0.95043 | 0.64482 | 0.91448 | 0.88533 | 0.73508 | 0.93008 | 1       | 0.32187 |
|          | <i>C</i>             | 0.42625 | 0.23007 | 0.44541 | 0.74816 | 0.49791 | 0.40602 | 0.38399 | 0.96052 | 1       |

## 9. Fluorescence microscopy images.

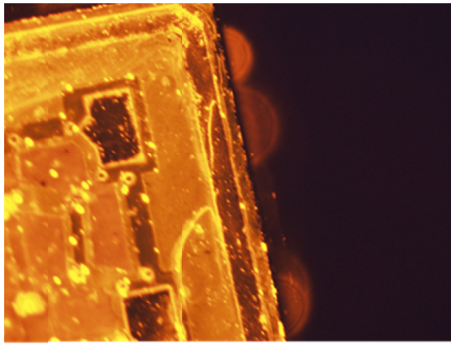

(a) APDMES

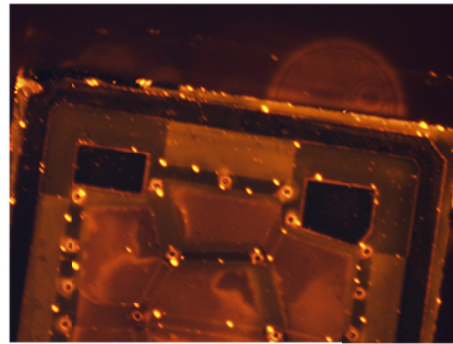

(b) APDES

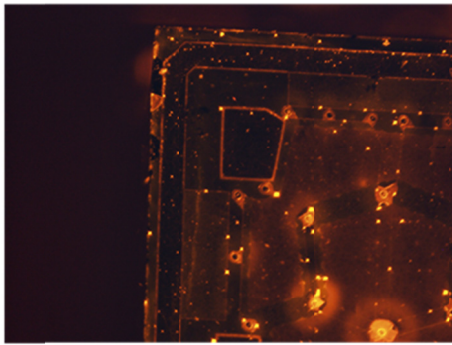

(b) APTES

**Figure S8.** The fluorescence microscopy images of APDMES, APDES and APTES reacted with fluorophores TAMRA. Relatively darker area corresponds to Au layer, while lighter area corresponds to silane-modified area.

### 10. The impact of flow rate on sensor's performance.

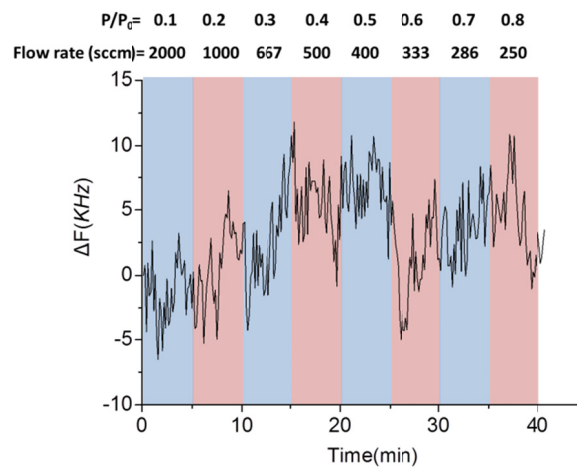

**Figure S9.** The real-time frequency of FBAR device at different flow rates of nitrogen.

The flow rates correspond to the total flow rates of different concentrations of vapor

in the detections (from 2000 sccm to 250 sccm).
